# Supplementary material
Source: ML conference proceedings conference paper supplement (https://openaccess.thecvf.com/content/CVPR2023/html/Ziwen_AutoFocusFormer_Image_Segmentation_CVPR_2023_paper.html)
Supplement: Supplementary file 1 [file Ziwen_AutoFocusFormer_Image_Segmentation_CVPR_2023_supplemental.zip]

Archive with 1 entries (1 files):
- aff_supp.pdf
