# Supplementary material
Source: ML conference proceedings conference paper supplement (https://openaccess.thecvf.com/content/CVPR2023/html/Ziwen_AutoFocusFormer_Image_Segmentation_CVPR_2023_paper.html)
Supplement: Supplementary file 1 [file Ziwen_AutoFocusFormer_Image_Segmentation_CVPR_2023_supplemental.zip › aff_supp.pdf]

# Supplementary: AutoFocusFormer: Image Segmentation off the Grid

Chen Ziwen<sup>1\*</sup>, Kaushik Patnaik<sup>2</sup>, Shuangfei Zhai<sup>2</sup>, Alvin Wan<sup>2</sup>  
Zhile Ren<sup>2</sup>, Alex Schwing<sup>2</sup>, Alex Colburn<sup>2</sup>, Li Fuxin<sup>1,2</sup>

<sup>1</sup>Oregon State University, <sup>2</sup>Apple Inc.

{chenziw, lif}@oregonstate.edu

{kaushik\_patnaik, szhai, alvinwan, zhile-ren, aschwing, alexcolburn, fli26}@apple.com

| Anchors | Space-filling curve type | Silhouette Coefficient $\uparrow$ |             |             |             |
|---------|--------------------------|-----------------------------------|-------------|-------------|-------------|
|         |                          | Stage 1                           | Stage 2     | Stage 3     | Stage 4     |
| ✓       | horizontal scanline      | <b>0.24</b>                       | <b>0.24</b> | 0.22        | <b>0.24</b> |
| ✗       | horizontal scanline      | -0.01                             | -0.20       | -0.16       | 0.03        |
| ✓       | Peano                    | 0.2                               | 0.23        | <b>0.29</b> | 0.21        |
| ✗       | Peano                    | 0.15                              | 0.15        | 0.14        | 0.17        |
| ✓       | Hilbert                  | 0.22                              | 0.23        | 0.22        | 0.19        |
| ✗       | Hilbert                  | 0.14                              | 0.15        | 0.16        | 0.18        |

Table 1. Ablation studies on the anchors and the type of space-filling curves used in the balanced clustering algorithm. For the cases without anchors, the space-filling curve is directly applied on the tokens. The metric scores are averaged over a random batch of 256 images from ImageNet.

## A. Additional Experimental Results

### A.1. Additional Ablation Studies

#### A.1.1 Ablation on Balanced Clustering Algorithm

We show more results and comparisons regarding our balanced clustering algorithm in Table 1. We study the benefits of space-filling anchors and different types of space-filling curves. We measure the quality of the resulting clusters using the silhouette coefficient [12] metric. The silhouette coefficient ranges from  $-1$  to  $1$ , measuring how clearly distinguishable the clusters are. A larger value indicates better clusters. Specifically, the silhouette score for the  $i$ -th token is calculated as

$$\frac{b_i - a_i}{\max(a_i, b_i)}, \quad (1)$$

where  $a_i$  is the mean distance between the position of the  $i$ -th token and all other tokens in the same cluster, and  $b_i$  is the mean distance between the position of the  $i$ -th token and all tokens in the next nearest cluster. The final silhouette coefficient is the average score of all the tokens. The numbers

\*Work done while Chen Ziwen was an intern at Apple Inc.

in Table 1 are averaged over a random batch of 256 images from ImageNet.

Our default setting is to use space-filling anchors, and apply a simple horizontal scanline as the space-filling curve on the anchors. A horizontal scanline sweeps the rows from left to right in odd rows and from right to left in even rows. We experimented with two other more complicated curves here: the Peano [11] and the Hilbert [6] curves. Both are recursive curves establishing a surjective mapping from a unit interval to a unit square. We also studied direct application of space-filling curves to tokens without use of the anchors. Results show that the anchors are necessary for obtaining more separated clusters. Also surprisingly, the simple horizontal scanline attains better cluster quality than the more complicated space-filling curves when the anchors are used. The visualization of the clustering results are shown in Fig. 1.

### A.2. Additional Segmentation Experiments

#### A.2.1 Additional Results on COCO and ADE20K

**COCO instance segmentation.** For instance segmentation on COCO (Table 2), we present very significant AP improvement for the Mini size, showing the capability of our model of being more efficient with limited resources. For Tiny and Small, we obtained par results with Swin with 10% decrease in FLOPs. For the 1/5 downsampling-rate models, we see they have significant computational benefits with little performance drop with respect to their 1/4 counterparts. We observe AP improvements for small objects ( $AP^S$ ) and regressions for large objects ( $AP^L$ ). We suspect that the standard decoder heads were not aggregating information well when the sampling rate is very uneven for large objects, and we aim to improve the decoder in future work. **Semantic segmentation with HCFormer.** HCFormer [13] performs prediction on the feature map at the coarsest level. Each token on the finer level will learn 9 similarity values to the tokens in a  $3 \times 3$  window in the coarser level, and the model uses the similarity values to interpolate the pre-

| Backbone               | Segmentation Head | Search Space   | Epochs | AP          | AP <sup>S</sup> | AP <sup>M</sup> | AP <sup>L</sup> | # Params | FLOPs                       |
|------------------------|-------------------|----------------|--------|-------------|-----------------|-----------------|-----------------|----------|-----------------------------|
| EdgeViT-XS [10]        | Mask R-CNN [5]    | -              | 12     | 38.3        | -               | -               | -               | 26.5M    | -                           |
| PVT v2-B1 [14]         | Mask R-CNN [5]    | -              | 12     | 38.8        | -               | -               | -               | 33.7M    | -                           |
| LightViT-T [7]         | Mask R-CNN [5]    | -              | 36     | 38.4        | -               | -               | -               | 28M      | 187G                        |
| Swin-Mini <sup>‡</sup> | Mask2Former* [1]  | 100 queries    | 50     | 33.1        | 13.8            | 35.2            | 53.7            | 25.8M    | 149G                        |
| AFF-Mini               | Mask2Former* [1]  | 100 queries    | 50     | <b>42.3</b> | <b>21.2</b>     | <b>45.6</b>     | <b>63.7</b>     | 25.8M    | 148G                        |
| AFF-Mini-1/5           | Mask2Former* [1]  | 100 queries    | 50     | <b>42.3</b> | <b>21.8</b>     | <b>45.7</b>     | <b>64.0</b>     | 25.8M    | <b>120G (-19% vs. Swin)</b> |
| PVT v2-B3 [14]         | Mask R-CNN [5]    | -              | 12     | 42.5        | -               | -               | -               | 64.9M    | -                           |
| LightViT-S [7]         | Mask R-CNN [5]    | -              | 36     | 39.9        | -               | -               | -               | 38M      | 204G                        |
| SpineNet-96 [2]        | Mask R-CNN [5]    | 1000 proposals | 350    | 41.5        | -               | -               | -               | 55.2M    | 315G                        |
| Swin-Tiny              | Mask2Former [1]   | 100 queries    | 50     | 45.0        | 24.5            | 48.3            | <b>67.4</b>     | 47M      | 232G                        |
| AFF-Tiny               | Mask2Former* [1]  | 100 queries    | 50     | <b>45.3</b> | <b>24.8</b>     | <b>49.2</b>     | 66.9            | 46M      | 204G (-12% vs. Swin)        |
| AFF-Tiny-1/5           | Mask2Former* [1]  | 100 queries    | 50     | 44.5        | 24.5            | 47.8            | 66.3            | 46M      | <b>152G (-34% vs. Swin)</b> |
| LightViT-B [7]         | Mask R-CNN [5]    | -              | 36     | 41.2        | -               | -               | -               | 54M      | 240G                        |
| PVT v2-B5 [14]         | Mask R-CNN [5]    | -              | 12     | 42.5        | -               | -               | -               | 101.6M   | -                           |
| SpineNet-190 [2]       | Mask R-CNN [5]    | 1000 proposals | 500    | 46.1        | -               | -               | -               | 176.2M   | 2077G                       |
| Swin-Small             | Mask2Former [1]   | 100 queries    | 50     | <b>46.3</b> | 25.3            | <b>50.3</b>     | <b>68.4</b>     | 69M      | 313G                        |
| AFF-Small              | Mask2Former* [1]  | 100 queries    | 50     | <b>46.4</b> | <b>27.0</b>     | 49.8            | 67.6            | 61.4M    | 281G (-10% vs. Swin)        |
| AFF-Small-1/5          | Mask2Former* [1]  | 100 queries    | 50     | 45.7        | 26.1            | 49.2            | 67.5            | 61.4M    | <b>206G (-34% vs. Swin)</b> |

Table 2. Instance segmentation on COCO instance val2017. “1/5” means the backbone uses 1/5 downsampling rate instead of the traditional 1/4 downsampling rate. \* The segmentation head is modified to accept point cloud input. <sup>‡</sup> This Swin backbone is trained using the same architecture configuration and training settings as our model. The random seed is fixed at 0.

| Backbone       | Segmentation Head | Crop Size | mIoU        | FLOPs        |
|----------------|-------------------|-----------|-------------|--------------|
| Swin-Small     | HCFormer [13]     | 512       | 48.8        | 56G          |
| PVT v2-B5 [14] | Semantic FPN [8]  | 512       | 48.7        | 91.9G        |
| AFF-Small      | HCFormer* [13]    | 512       | <b>49.2</b> | <b>51.1G</b> |

Table 3. Semantic segmentation on ADE20K val with HCFormer head. \* The segmentation head is modified to accept point cloud input.

| Class      | Swin-Tiny | AFF-Tiny | Swin-Small | AFF-Small |
|------------|-----------|----------|------------|-----------|
| person     | 36.3      | 38.6     | 36.8       | 39.2      |
| rider      | 29.0      | 30.4     | 28.7       | 33.3      |
| car        | 59.3      | 60.9     | 59.9       | 61.4      |
| truck      | 41.4      | 43.1     | 42.0       | 41.1      |
| bus        | 60.4      | 65.1     | 65.2       | 66.9      |
| train      | 43.7      | 52.3     | 51.7       | 55.4      |
| motorcycle | 24.5      | 26.2     | 25.2       | 28.9      |
| bicycle    | 23.2      | 24.9     | 24.7       | 25.6      |
| average    | 39.7      | 42.7     | 41.8       | 44.0      |

Table 4. Class-wise Instance Segmentation AP on CityScapes (backbone Swin vs. AFF) with Mask2Former segmentation head.

diction all the way up to the highest resolution. We replace the square window by 9 nearest neighbors in the coarser level, while the calculation of similarity values stays the same. In Table 3, we show semantic segmentation results on the ADE20K [15] dataset with the HCFormer [13] head for the AFF-Small model. We achieve a +0.4% increase in the mIoU metric with -8% FLOP count.

### A.2.2 Class-wise Segmentation Results

To facilitate understanding how AFF improves over the baselines, in addition to score breakdown according to object sizes, we further provide class-wise segmentation score breakdown in Table 4 and Table 5. However, through these results, we don’t see apparent correlation between score improvement and classes. We guess that the improvement

from AFF is more correlated with object sizes than specific categories.

## B. Segmentation Training Setting Details

We largely follow the settings of Mask2Former [1] in training including weight decay, augmentations and training steps. More specifically, we use the AdamW [9] optimizer with the step learning rate scheduler. We use a weight decay of 0.05. We apply a learning rate multiplier 0.1 to the backbone. We set  $\alpha = 4$  for ADE20K and COCO, and  $\alpha = 8$  for Cityscapes. We use a learnable shepard power initialized at 6 for ADE20K and Cityscapes, and a fixed power 4 for COCO.

For ADE20K, we train for 80K steps with a batch size of 32 and a base learning rate 0.0002. The FLOP count is calculated on a random  $512 \times 512$  image, as we crop all images to this size during training.

For COCO, we train for 50 epochs with a batch size of 64 and a base learning rate 0.0002. We apply the large-scale jittering (LSJ) augmentation [3,4] with a random scale sampled from range 0.1 to 2.0 followed by a fixed size crop to  $1024 \times 1024$  during training. During inference we use the standard Mask R-CNN [5] inference setting where we re-size an image with shorter side to 800 and longer side up to 1333. The FLOP count is averaged over 100 validation images for the COCO FLOP count. We scale the learning rate down by 0.1 at 0.9 and 0.95 fractions of the total training steps.

For Cityscapes, we train for 45K steps with a batch size of 32 and a base learning rate 0.0002. During training, we use a crop size of  $512 \times 1024$ . During inference, we use the entire image ( $1024 \times 2048$ ). We use 100 queries for all models.

For all training tasks, we do not use test-time augmentation

| Class         | Swin-Tiny | AFF-Tiny | Class        | Swin-Tiny | AFF-Tiny | Class          | Swin-Tiny | AFF-Tiny |
|---------------|-----------|----------|--------------|-----------|----------|----------------|-----------|----------|
| person        | 50.541    | 50.210   | bicycle      | 23.690    | 23.861   | car            | 45.443    | 46.281   |
| motorcycle    | 40.718    | 40.840   | airplane     | 60.491    | 59.508   | bus            | 70.112    | 71.876   |
| train         | 71.873    | 71.853   | truck        | 42.820    | 44.763   | boat           | 29.597    | 30.855   |
| traffic light | 30.971    | 30.314   | fire hydrant | 70.358    | 68.929   | stop sign      | 68.312    | 68.553   |
| parking meter | 50.348    | 50.078   | bench        | 24.617    | 25.122   | bird           | 33.864    | 34.639   |
| cat           | 76.870    | 77.594   | dog          | 68.567    | 70.120   | horse          | 47.912    | 47.360   |
| sheep         | 53.354    | 54.451   | cow          | 56.130    | 55.105   | elephant       | 66.213    | 65.602   |
| bear          | 77.146    | 81.873   | zebra        | 65.191    | 66.634   | giraffe        | 61.708    | 61.146   |
| backpack      | 23.438    | 23.936   | umbrella     | 54.531    | 53.804   | handbag        | 22.801    | 24.080   |
| tie           | 37.348    | 36.612   | suitcase     | 50.478    | 50.670   | frisbee        | 68.770    | 69.198   |
| skis          | 7.103     | 7.668    | snowboard    | 31.047    | 31.945   | sports ball    | 50.537    | 50.470   |
| kite          | 38.308    | 38.900   | baseball bat | 38.899    | 38.439   | baseball glove | 45.918    | 48.275   |
| skateboard    | 37.358    | 41.363   | surfboard    | 40.484    | 41.238   | tennis racket  | 61.187    | 61.463   |
| bottle        | 42.015    | 42.877   | wine glass   | 37.538    | 38.286   | cup            | 47.234    | 49.267   |
| fork          | 23.725    | 24.974   | knife        | 18.923    | 19.837   | spoon          | 19.997    | 22.391   |
| bowl          | 45.014    | 45.610   | banana       | 27.437    | 25.364   | apple          | 24.022    | 25.128   |
| sandwich      | 47.375    | 47.423   | orange       | 37.039    | 37.065   | broccoli       | 24.394    | 25.494   |
| carrot        | 24.957    | 24.435   | hot dog      | 45.251    | 41.675   | pizza          | 58.760    | 57.535   |
| donut         | 55.920    | 57.046   | cake         | 49.705    | 48.989   | chair          | 26.461    | 27.313   |
| couch         | 48.393    | 47.571   | potted plant | 27.185    | 26.932   | bed            | 45.991    | 44.751   |
| dining table  | 22.249    | 23.094   | toilet       | 68.757    | 68.878   | tv             | 67.036    | 66.700   |
| laptop        | 69.644    | 70.101   | mouse        | 66.043    | 61.897   | remote         | 39.732    | 40.769   |
| keyboard      | 55.528    | 56.306   | cell phone   | 41.274    | 42.047   | microwave      | 65.497    | 64.513   |
| oven          | 39.090    | 38.031   | toaster      | 40.422    | 39.761   | sink           | 41.816    | 42.876   |
| refrigerator  | 66.878    | 66.622   | book         | 15.363    | 16.021   | clock          | 56.141    | 57.378   |
| vase          | 41.719    | 42.520   | scissors     | 35.620    | 37.310   | teddy bear     | 55.229    | 52.801   |
| hair drier    | 9.155     | 14.401   | toothbrush   | 28.801    | 26.657   |                |           |          |

Table 5. Class-wise Instance Segmentation AP on COCO (backbone Swin vs. AFF) with Mask2Former segmentation head.

or multi-scale testing. For all segmentation results, we report the best validation result in one run with seed fixed at 0. Validation results are reported every 2500 steps.

## C. Qualitative Comparisons

In Fig. 2, we provide a qualitative comparison of AFF-Small and Swin-Small with Mask2Former segmentation head on the Cityscapes panoptic segmentation data, along with the remaining token locations in stage 2, 3 and 4. Our model is able to retain tokens on very small objects even in the last stage, which provides the foundation to capture crowded, small objects, such as the people sitting in the cafe in the first example in Fig. 2.

In Fig. 3, we provide a qualitative comparison between AFF-Tiny and Swin-Tiny with Mask2Former segmentation head on the ADE20K semantic segmentation data. Our model better captures small objects (e.g., the pole in the first row, the chickens in the third row, and the rug in the fourth row) with fewer false positives in small objects (compared to the Swin baseline in the second row).

## References

- [1] Bowen Cheng, Ishan Misra, Alexander G Schwing, Alexander Kirillov, and Rohit Girdhar. Masked-attention mask transformer for universal image segmentation. In *Proceedings of the IEEE Conference on Computer Vision and Pattern Recognition (CVPR)*, pages 1290–1299, 2022. 2
- [2] Xianzhi Du, Tsung-Yi Lin, Pengchong Jin, Golnaz Ghiasi, Mingxing Tan, Yin Cui, Quoc V Le, and Xiaodan Song. Spinenet: Learning scale-permuted backbone for recognition and localization. In *Proceedings of the IEEE Conference on Computer Vision and Pattern Recognition (CVPR)*, pages 11592–11601, 2020. 2
- [3] Xianzhi Du, Barret Zoph, Wei-Chih Hung, and Tsung-Yi Lin. Simple training strategies and model scaling for object detection. *arXiv preprint arXiv:2107.00057*, 2021. 2
- [4] Golnaz Ghiasi, Yin Cui, Aravind Srinivas, Rui Qian, Tsung-Yi Lin, Ekin D Cubuk, Quoc V Le, and Barret Zoph. Simple copy-paste is a strong data augmentation method for instance segmentation. In *Proceedings of the IEEE Conference on Computer Vision and Pattern Recognition (CVPR)*, pages 2918–2928, 2021. 2
- [5] Kaiming He, Georgia Gkioxari, Piotr Dollár, and Ross Girshick. Mask r-cnn. In *Proceedings of the IEEE International Conference on Computer Vision (ICCV)*, pages 2961–2969, 2017. 2
- [6] David Hilbert. Über die stetige abbildung einer linie auf ein flächenstück. In *Dritter Band: Analysis: Grundlagen der Mathematik: Physik Verschiedenes*, pages 1–2. Springer, 1935. 1
- [7] Tao Huang, Lang Huang, Shan You, Fei Wang, Chen Qian, and Chang Xu. Lightvit: Towards light-weight convolution-free vision transformers. *arXiv preprint arXiv:2207.05557*, 2022. 2
- [8] Alexander Kirillov, Ross Girshick, Kaiming He, and Piotr Dollár. Panoptic feature pyramid networks. In *Proceedings of the IEEE Conference on Computer Vision and Pattern Recognition (CVPR)*, pages 6399–6408, 2019. 2
- [9] Ilya Loshchilov and Frank Hutter. Decoupled weight decay regularization. *arXiv preprint arXiv:1711.05101*, 2017. 2

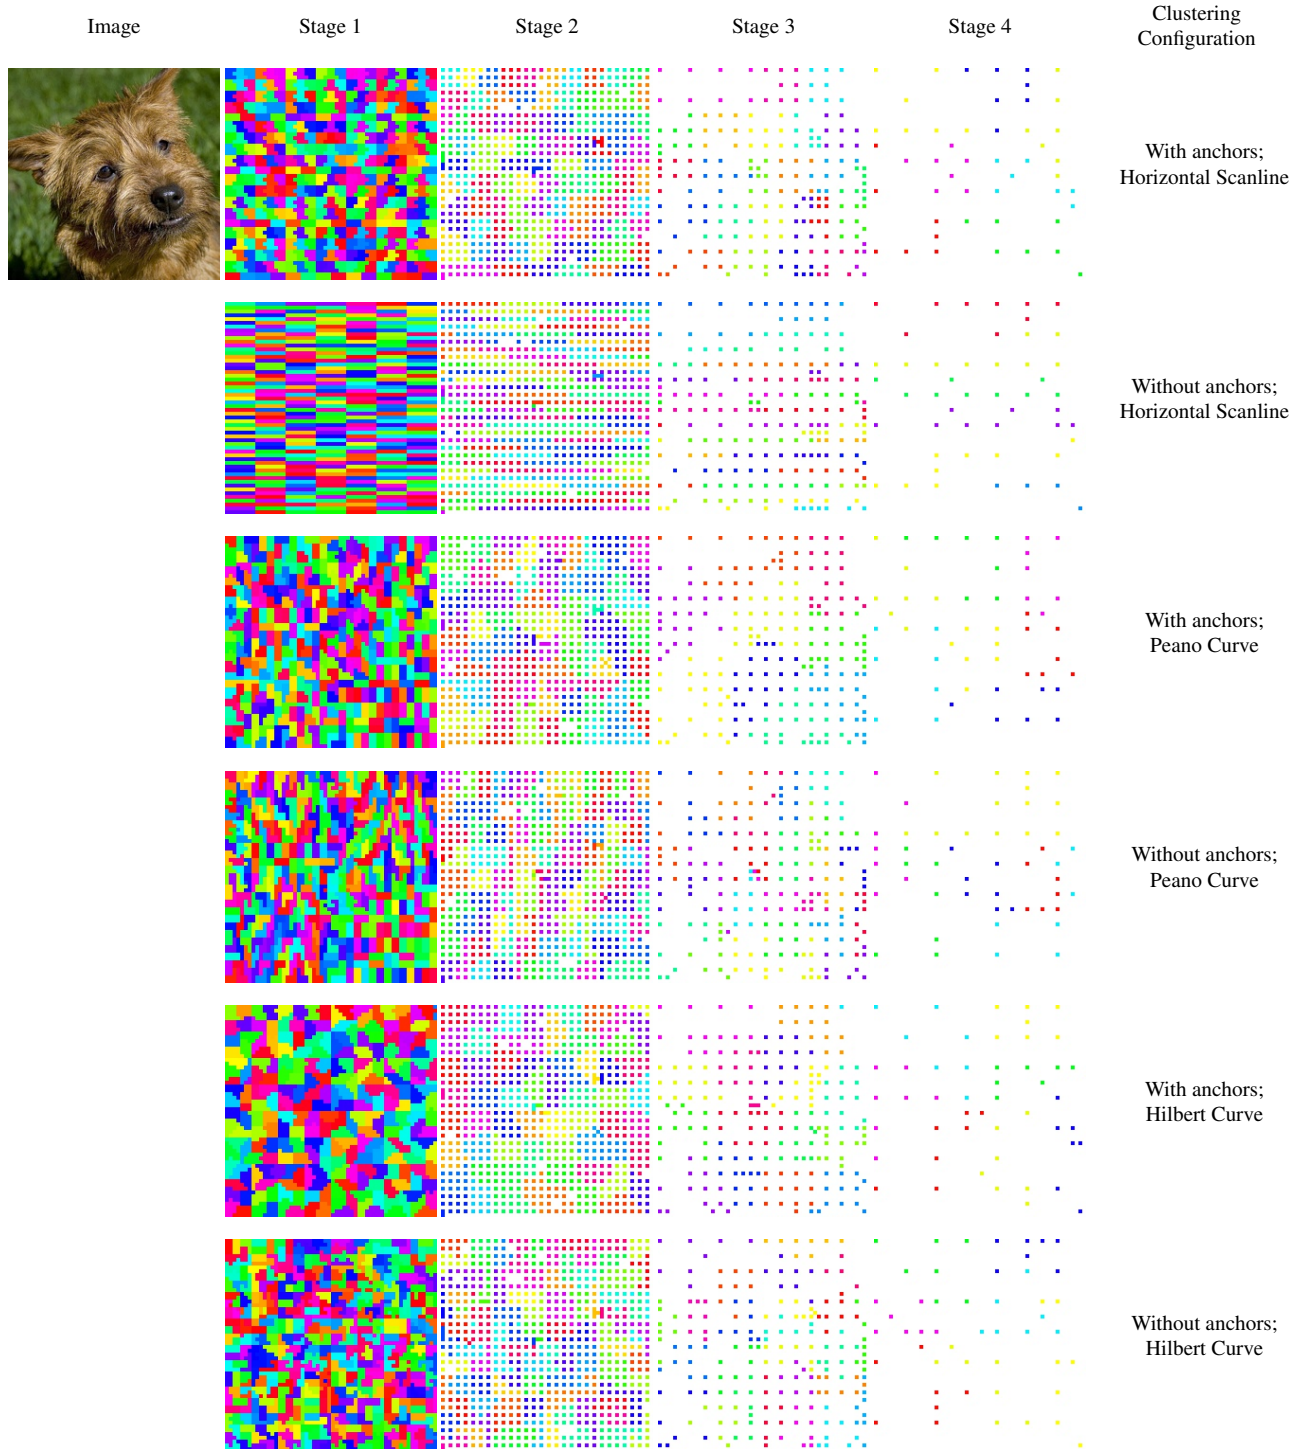

Figure 1. Visualization of the balanced clustering results with different configurations of anchors and space-filling curves. For the cases without anchors, the space-filling curve is applied directly on the tokens. From the results, we observe the use of anchors to be critical for obtaining more rounded and separated clusters. Although Peano and Hilbert are recursive curves, the uneven density of the tokens due to adaptive sampling still breaks the local euclidean metric if we directly apply these curves on the tokens.

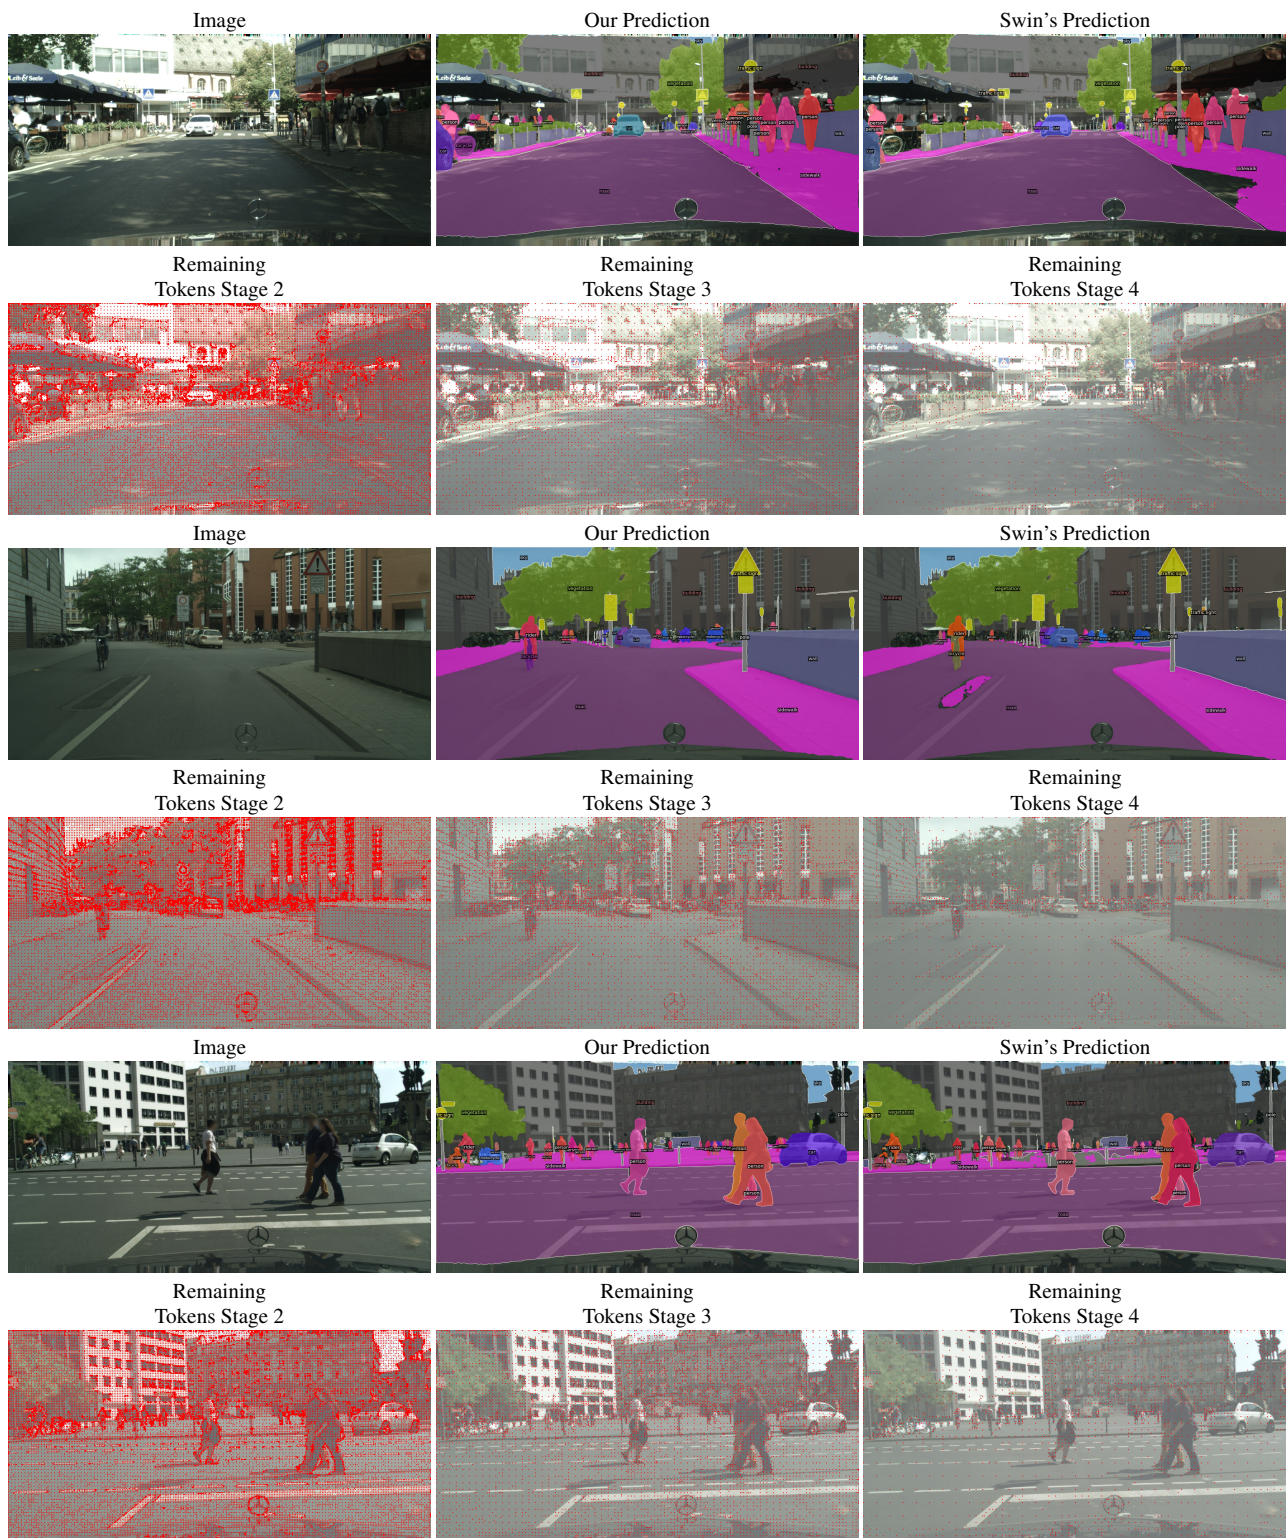

Figure 2. Additional qualitative comparison between AFF-Small and Swin-Small with Mask2Former segmentation head on Cityscapes panoptic segmentation. The red pixels in the even rows indicate the locations of the remaining tokens in stage 2, 3 and 4.

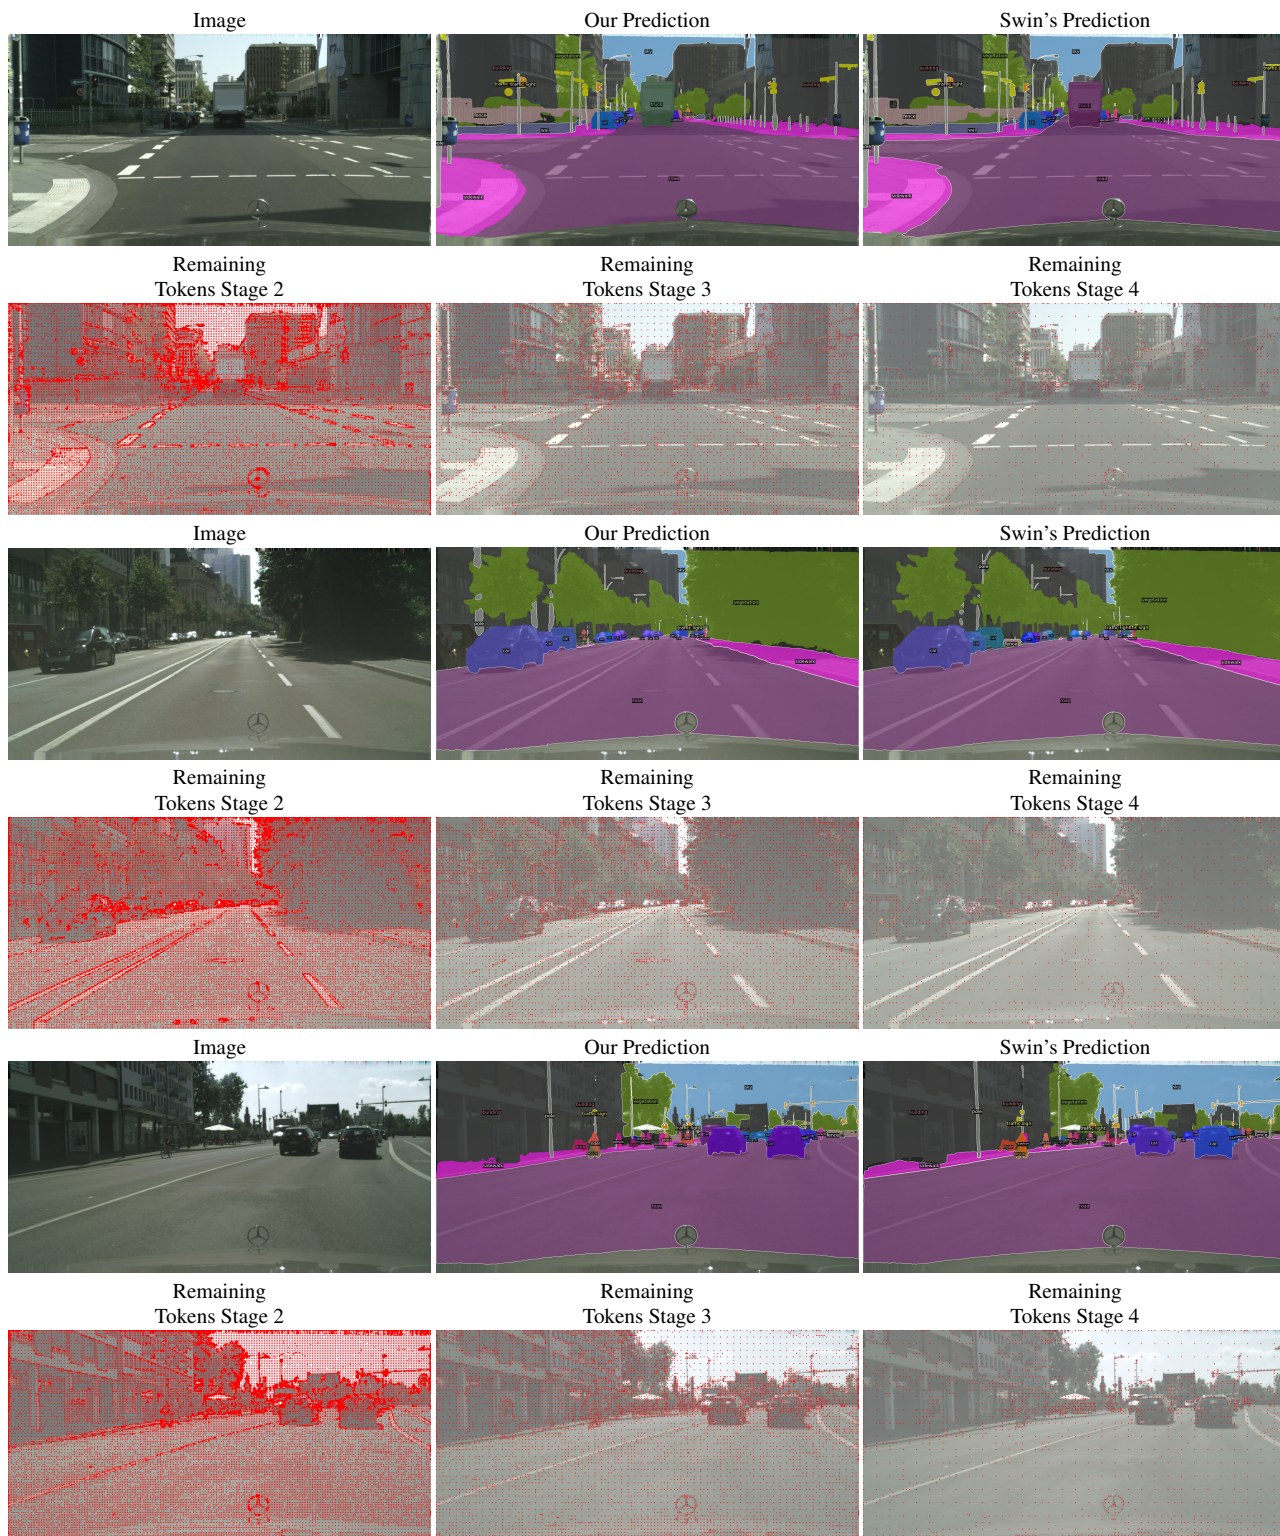

Figure 2. (Continued) Additional qualitative comparison between AFF-Small and Swin-Small with Mask2Former segmentation head on Cityscapes panoptic segmentation. The red pixels in the even rows indicate the locations of the remaining tokens in stage 2, 3 and 4.

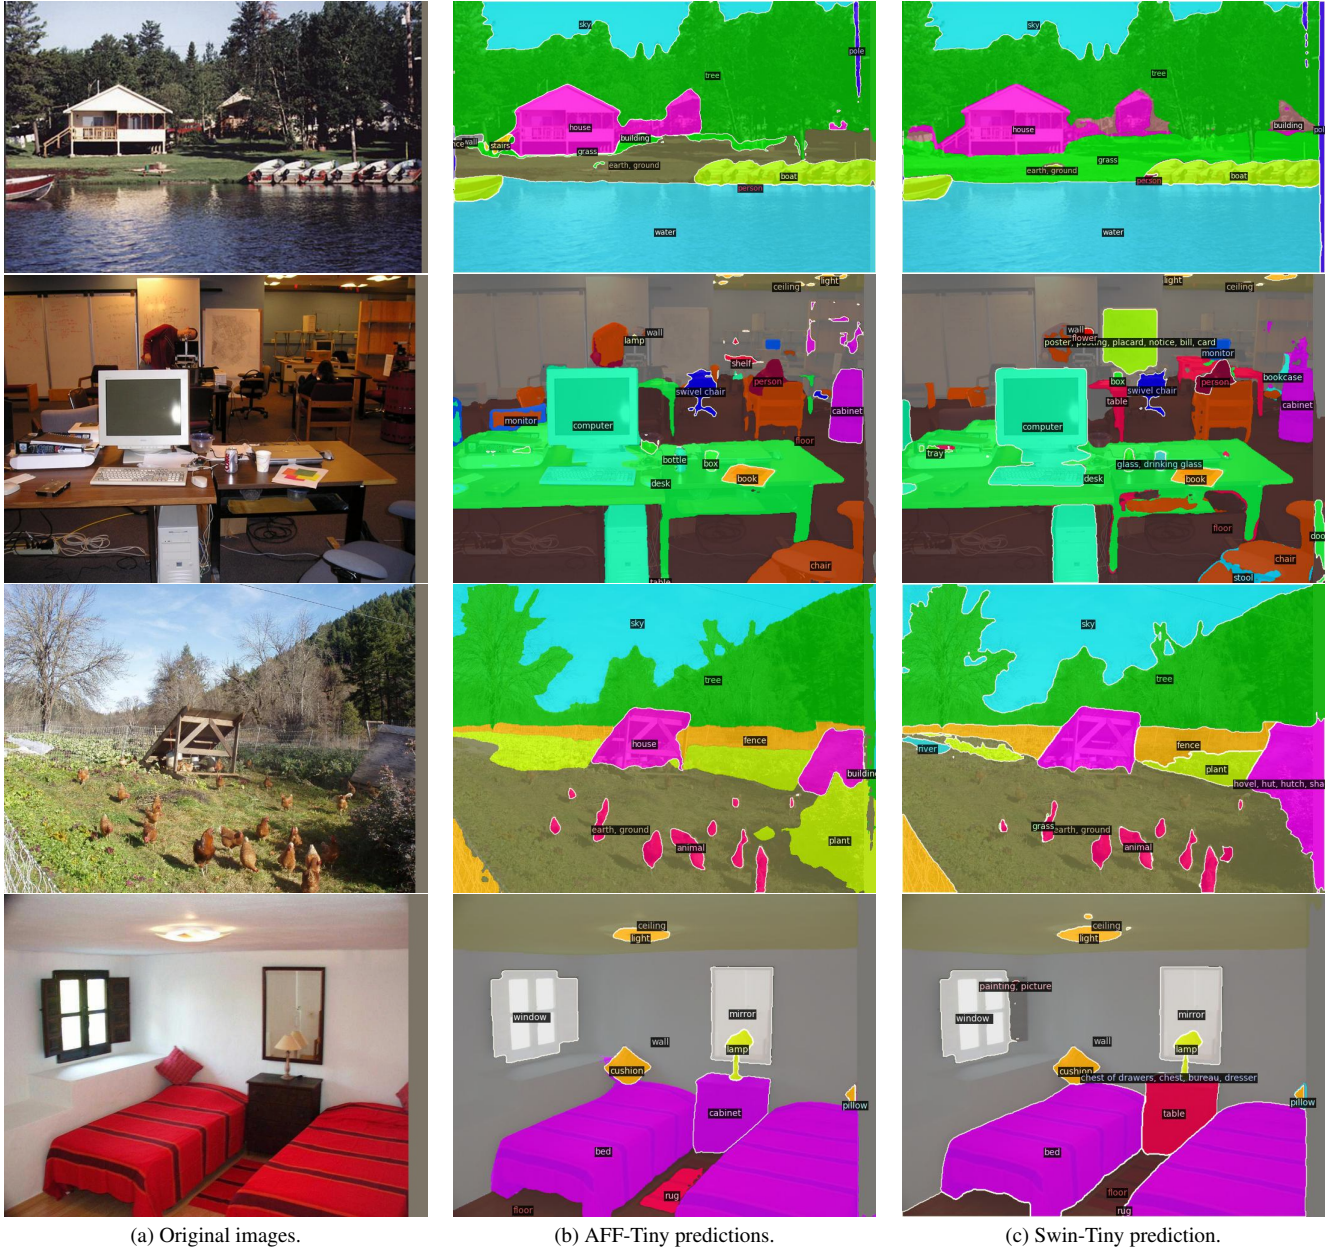

Figure 3. Qualitative comparison between AFF-Tiny and Swin-Tiny with Mask2Former segmentation head on ADE20K semantic segmentation. First column: original image. Second column: AFF prediction. Third column: Swin prediction.

- Martinez. Edgevits: Competing light-weight cnns on mobile devices with vision transformers. In *Proceedings of the European Conference on Computer Vision (ECCV)*, pages 294–311. Springer, 2022. [2](#)
- [11] Giuseppe Peano. Sur une courbe, qui remplit toute une aire plane. In *Arbeiten zur Analysis und zur mathematischen Logik*, pages 71–75. Springer, 1990. [1](#)
- [12] Peter J Rousseeuw. Silhouettes: a graphical aid to the interpretation and validation of cluster analysis. *Journal of computational and applied mathematics*, 20:53–65, 1987. [1](#)
- [13] Teppei Suzuki. Clustering as attention: Unified image segmentation with hierarchical clustering. *arXiv preprint arXiv:2205.09949*, 2022. [1](#), [2](#)
- [14] Wenhai Wang, Enze Xie, Xiang Li, Deng-Ping Fan, Kaitao Song, Ding Liang, Tong Lu, Ping Luo, and Ling Shao. Pvt v2: Improved baselines with pyramid vision transformer. *Computational Visual Media*, 8(3):415–424, 2022. [2](#)
- [15] Bolei Zhou, Hang Zhao, Xavier Puig, Sanja Fidler, Adela Barriuso, and Antonio Torralba. Scene parsing through ade20k dataset. In *Proceedings of the IEEE Conference*

*on Computer Vision and Pattern Recognition (CVPR)*, pages  
633–641, 2017. [2](#)
